# Supplementary material
Source: Springer Nature journal article supplement (https://www.springermedizin.de/resource/supplementary/12889_2005_475_MOESM2_ESM.pdf/9500952)

### Men n=203

■ non-user ■ user

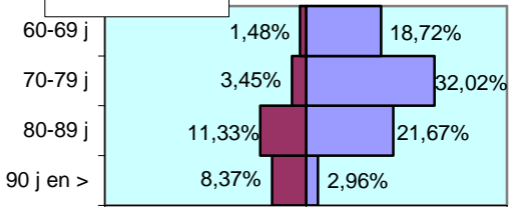

### Women n=218

■ non-user ■ user

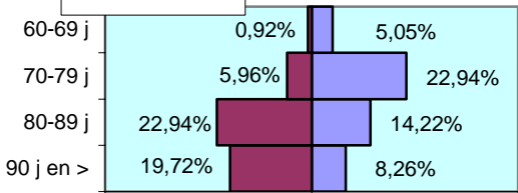

Supplement: MOESM2 [file 9500952]
